# Supplementary material
Source: PubMed Central journal article supplement (PMC8340387)
Supplement: ao1c02984_si_001.pdf [file ao1c02984_si_001.pdf]

Supporting Information

# Production of Proteins of SARS-CoV-2 Proteome for Drug Discovery

*Choon Kim, Kiran V. Mahasenan, Atul Bhardwaj, Olaf Wiest, Mayland Chang, and Shahriar  
Mobashery\**

Department of Chemistry and Biochemistry, University of Notre Dame, Notre Dame, IN 46556,  
USA

**Table S1.** Synthetic SARS-CoV-2 genes.

| No. | Gene (peptide)             | Total AA | Total length | Comment <sup>a</sup>                                                                      |
|-----|----------------------------|----------|--------------|-------------------------------------------------------------------------------------------|
| 1   | <i>nsp1</i> (G7-N178)      | 230 aa   | 701 bp       | 5'-NcoI-6xHis-2xStrep-TEV-NdeI- <i>nsp1</i> -XhoI-3'; Removed <i>N</i> -terminal disorder |
| 2   | <i>nsp2</i> (A1-G638)      | 639 aa   | 1929 bp      | Full-length                                                                               |
| 3   | <i>nsp3</i> (E206-N1410)   | 1206 aa  | 3630 bp      | Removed <i>N</i> -terminal disorder and <i>C</i> -terminal 4 transmembrane (TM) regions   |
| 4   | <i>nsp3N</i> (E206-E374)   | 169 aa   | 519 bp       | ADP-ribosylhydrolase (ARH) domain of NSP3                                                 |
| 5   | <i>nsp3P</i> (E746-P1061)  | 317 aa   | 963 bp       | PL <sup>pro</sup> domain of NSP3                                                          |
| 6   | <i>nsp3C</i> (D1584-G1945) | 363 aa   | 1101 bp      | <i>C</i> -terminal domain of NSP3                                                         |
| 7   | <i>nsp4N</i> (K1-D279)     | 247 aa   | 753 bp       | <i>N</i> -terminal part; removed <i>N</i> - & <i>C</i> -terminal TM regions               |
| 8   | <i>nsp4C</i> (S386-Q500)   | 116 aa   | 360 bp       | <i>C</i> -terminal part after 4 TM regions                                                |
| 9   | <i>nsp5</i> (S1-Q306)      | 307 aa   | 933 bp       | Full-length                                                                               |
| 10  | <i>nsp7</i> (S1-Q83)       | 84 aa    | 264 bp       | Full-length                                                                               |
| 11  | <i>nsp8</i> (A1-Q198)      | 199 aa   | 609 bp       | Full-length                                                                               |
| 12  | <i>nsp9</i> (N1-Q113)      | 114 aa   | 354 bp       | Full-length                                                                               |
| 13  | <i>nsp10</i> (A1-Q139)     | 140 aa   | 432 bp       | Full-length                                                                               |
| 14  | <i>nsp12</i> (S1-Q932)     | 933 aa   | 2811 bp      | Full-length                                                                               |
| 15  | <i>nsp12P</i> (Q117-E919)  | 804 aa   | 2424 bp      | Q117-E919 in SARS-CoV crystalized                                                         |
| 16  | <i>nsp13</i> (A1-Q601)     | 602 aa   | 1818 bp      | Full-length                                                                               |
| 17  | <i>nsp14</i> (A1-Q527)     | 528 aa   | 1596 bp      | Full-length                                                                               |
| 18  | <i>nsp15</i> (S1-A346)     | 347 aa   | 1053 bp      | Full-length                                                                               |
| 19  | <i>nsp16</i> (S1-N298)     | 299 aa   | 909 bp       | Full-length                                                                               |
| 20  | <i>S</i> (Q14-K1211)       | 1199 aa  | 3609 bp      | Removed signal peptide and <i>C</i> -terminal TM region                                   |
| 21  | <i>S1</i> (Q14-R685)       | 673 aa   | 2031 bp      | S1 domain; removed signal peptide                                                         |
| 22  | <i>S2</i> (S686-K1211)     | 527 aa   | 1593 bp      | S2 domain; removed <i>C</i> -terminal TM region                                           |
| 23  | <i>orf3a</i> (M125-L275)   | 151 aa   | 465 bp       | Removed <i>N</i> -terminal 3 TM regions                                                   |
| 24  | <i>M</i> (R101-N203)       | 104 aa   | 324 bp       | Removed <i>N</i> -terminal TM region                                                      |
| 25  | <i>orf7a</i> (E16-L96)     | 82 aa    | 258 bp       | Removed signal peptide and <i>C</i> -terminal TM region                                   |
| 26  | <i>orf8</i> (M1-I121)      | 121 aa   | 375 bp       | Full-length                                                                               |
| 27  | <i>N</i> (M1-A419)         | 419 aa   | 1269 bp      | Full-length; highly disordered structure; phosphoprotein                                  |
| 28  | <i>NS</i> (T49-D358)       | 311 aa   | 945 bp       | Removed <i>N</i> - & <i>C</i> -terminal disorders                                         |
| 29  | <i>orf9b</i> (M1-K97)      | 97 aa    | 303 bp       | Full-length                                                                               |

<sup>a</sup> Each construct except for *nsp1* contains NdeI and XhoI restriction sites at the 5'-end and the 3'-end, respectively.; a stop codon is added in each construct.

**Table S2.** Grouping of the compounds from virtual screening against the ARH domain of NSP3.

| Group    | Number | Reference ID        | MW     | Group    | Number | Reference ID        | MW     |
|----------|--------|---------------------|--------|----------|--------|---------------------|--------|
| <b>1</b> | 1      | MolPort-002-285-607 | 326.33 | <b>3</b> | 21     | MolPort-005-816-640 | 329.39 |
|          | 2      | MolPort-021-778-386 | 336.40 |          | 22     | MolPort-023-233-580 | 340.39 |
|          | 3      | MolPort-000-123-877 | 291.33 |          | 23     | MolPort-020-131-668 | 315.35 |
|          | 4      | MolPort-038-417-546 | 342.38 |          | 24     | MolPort-028-804-245 | 284.28 |
|          | 5      | MolPort-035-761-911 | 333.35 |          | 25     | MolPort-023-169-993 | 313.34 |
|          | 6      | MolPort-042-569-276 | 340.36 |          | 26     | MolPort-009-143-528 | 349.36 |
|          | 7      | MolPort-039-034-165 | 341.42 |          | 27     | MolPort-010-194-066 | 312.34 |
|          | 8      | MolPort-021-772-677 | 345.60 |          | 28     | MolPort-029-915-393 | 344.32 |
|          | 9      | MolPort-002-005-643 | 338.81 |          | 29     | MolPort-023-153-919 | 329.10 |
|          | 10     | MolPort-007-572-698 | 320.28 |          | 30     | MolPort-009-583-655 | 319.36 |
| <b>2</b> | 11     | MolPort-004-919-118 | 343.40 | <b>4</b> | 31     | MolPort-020-046-308 | 344.44 |
|          | 12     | MolPort-009-567-089 | 340.39 |          | 32     | MolPort-027-660-994 | 345.42 |
|          | 13     | MolPort-020-092-666 | 312.33 |          | 33     | MolPort-004-103-984 | 324.38 |
|          | 14     | MolPort-019-642-212 | 315.30 |          | 34     | MolPort-020-102-008 | 337.38 |
|          | 15     | MolPort-009-321-750 | 298.36 |          | 35     | MolPort-005-716-238 | 303.27 |
|          | 16     | MolPort-023-149-743 | 345.29 |          | 36     | MolPort-004-005-399 | 343.29 |
|          | 17     | MolPort-009-641-058 | 314.39 |          | 37     | MolPort-028-955-822 | 298.31 |
|          | 18     | MolPort-009-020-554 | 321.34 |          | 38     | MolPort-023-181-524 | 313.36 |
|          | 19     | MolPort-004-142-938 | 292.29 |          | 39     | MolPort-004-273-745 | 304.28 |
|          | 20     | MolPort-023-149-032 | 300.32 |          | 40     | MolPort-020-053-080 | 349.39 |

**Table S2.** Continued.

| Group    | Number | Reference ID        | MW     | Group    | Number | Reference ID        | MW     |
|----------|--------|---------------------|--------|----------|--------|---------------------|--------|
| <b>5</b> | 41     | MolPort-005-315-087 | 315.33 | <b>7</b> | 61     | MolPort-020-160-315 | 343.31 |
|          | 42     | MolPort-019-645-074 | 315.39 |          | 62     | MolPort-003-334-648 | 321.33 |
|          | 43     | MolPort-009-542-746 | 325.37 |          | 63     | MolPort-009-545-284 | 274.28 |
|          | 44     | MolPort-019-667-806 | 299.29 |          | 64     | MolPort-023-143-503 | 310.40 |
|          | 45     | MolPort-004-186-478 | 333.35 |          | 65     | MolPort-009-074-353 | 323.36 |
|          | 46     | MolPort-004-217-503 | 347.43 |          | 66     | MolPort-023-239-714 | 299.29 |
|          | 47     | MolPort-020-095-499 | 322.34 |          | 67     | MolPort-019-683-071 | 336.36 |
|          | 48     | MolPort-009-576-607 | 341.39 |          | 68     | MolPort-005-708-483 | 319.32 |
|          | 49     | MolPort-009-125-249 | 338.37 |          | 69     | MolPort-027-655-284 | 336.35 |
|          | 50     | MolPort-020-097-406 | 309.28 |          | 70     | MolPort-028-801-666 | 294.28 |
| <b>6</b> | 51     | MolPort-009-539-431 | 312.34 | <b>8</b> | 71     | MolPort-009-321-655 | 342.37 |
|          | 52     | MolPort-019-666-473 | 331.34 |          | 72     | MolPort-023-233-484 | 307.35 |
|          | 53     | MolPort-009-448-623 | 283.33 |          | 73     | MolPort-023-190-334 | 311.34 |
|          | 54     | MolPort-030-022-102 | 308.32 |          | 74     | MolPort-023-188-618 | 305.76 |
|          | 55     | MolPort-005-314-867 | 344.39 |          | 75     | MolPort-028-604-292 | 349.39 |
|          | 56     | MolPort-027-709-051 | 320.40 |          | 76     | MolPort-044-431-079 | 327.34 |
|          | 57     | MolPort-023-139-905 | 323.35 |          | 77     | MolPort-039-058-480 | 312.33 |
|          | 58     | MolPort-019-675-323 | 328.70 |          | 78     | MolPort-009-650-513 | 325.37 |
|          | 59     | MolPort-023-174-763 | 340.32 |          | 79     | MolPort-023-295-049 | 303.38 |
|          | 60     | MolPort-009-473-445 | 341.33 |          | 80     | MolPort-023-295-351 | 321.34 |

**Table S2.** Continued.

| Group     | Number | Reference ID        | MW     | Group     | Number | Reference ID        | MW     |
|-----------|--------|---------------------|--------|-----------|--------|---------------------|--------|
| <b>9</b>  | 81     | MolPort-008-349-576 | 346.42 | <b>11</b> | 101    | MolPort-005-973-205 | 341.37 |
|           | 82     | MolPort-042-671-819 | 349.39 |           | 102    | MolPort-000-849-801 | 330.73 |
|           | 83     | MolPort-008-009-694 | 293.33 |           | 103    | MolPort-003-008-282 | 300.33 |
|           | 84     | MolPort-005-980-024 | 343.43 |           | 104    | MolPort-000-804-173 | 321.38 |
|           | 85     | MolPort-009-011-201 | 311.34 |           | 105    | MolPort-005-988-009 | 344.39 |
|           | 86     | MolPort-006-828-377 | 298.32 |           | 106    | MolPort-027-846-272 | 326.32 |
|           | 87     | MolPort-002-291-055 | 334.29 |           | 107    | MolPort-001-904-777 | 327.38 |
|           | 88     | MolPort-019-952-145 | 299.33 |           | 108    | MolPort-019-795-368 | 314.31 |
|           | 89     | MolPort-002-289-145 | 349.41 |           | 109    | MolPort-000-835-912 | 333.35 |
|           | 90     | MolPort-003-006-209 | 255.23 |           | 110    | MolPort-001-625-946 | 343.36 |
| <b>10</b> | 91     | MolPort-000-664-093 | 334.11 | <b>12</b> | 111    | MolPort-004-856-353 | 299.71 |
|           | 92     | MolPort-002-952-102 | 339.35 |           | 112    | MolPort-000-813-761 | 339.31 |
|           | 93     | MolPort-019-694-241 | 316.32 |           | 113    | MolPort-006-809-859 | 308.40 |
|           | 94     | MolPort-002-574-436 | 294.33 |           | 114    | MolPort-028-604-154 | 337.40 |
|           | 95     | MolPort-003-000-526 | 329.27 |           | 115    | MolPort-000-773-077 | 309.32 |
|           | 96     | MolPort-044-431-605 | 332.36 |           | 116    | MolPort-038-429-727 | 335.37 |
|           | 97     | MolPort-002-665-215 | 327.31 |           | 117    | MolPort-006-805-445 | 338.32 |
|           | 98     | MolPort-028-604-773 | 344.37 |           | 118    | MolPort-006-808-970 | 308.34 |
|           | 99     | MolPort-005-919-460 | 300.32 |           | 119    | MolPort-038-430-484 | 337.43 |
|           | 100    | MolPort-005-308-515 | 316.32 |           |        |                     |        |

**Table S2.** Continued.

| Group     | Number | Reference ID        | MW     | Group     | Number | Reference ID         | MW     |
|-----------|--------|---------------------|--------|-----------|--------|----------------------|--------|
| <b>13</b> | 121    | MolPort-021-767-645 | 300.32 | <b>15</b> | 139    | MolPort-044-809-313  | 354.41 |
|           | 122    | MolPort-029-903-833 | 367.45 |           | 140    | MolPort-000-782-326  | 387.41 |
|           | 123    | MolPort-007-606-006 | 325.21 |           | 141    | MolPort-044-809-457  | 329.37 |
|           | 124    | MolPort-007-06-035  | 381.44 |           | 142    | MolPort-000-841-069  | 353.33 |
|           | 125    | MolPort-027-694-345 | 348.45 |           | 143    | MolPort-044-431-816  | 360.80 |
|           | 126    | MolPort-009-564-626 | 297.36 |           | 144    | MolPort-000-827-816  | 353.33 |
|           | 127    | MolPort-035-704-162 | 337.43 |           | 145    | MolPort-044-809-742  | 376.82 |
|           | 128    | MolPort-035-704-312 | 337.43 |           | 146    | MolPort-044-431-634  | 360.80 |
|           | 129    | MolPort-035-702-334 | 365.48 |           | 147    | MolPort-000-838-047  | 351.79 |
| <b>14</b> | 130    | MolPort-029-882-857 | 309.37 | <b>16</b> | 148    | MolPort-044-809-270  | 325.37 |
|           | 131    | MolPort-029-882-697 | 351.35 |           | 149    | MolPort-0000-814-999 | 271.28 |
|           | 132    | MolPort-035-703-846 | 337.43 |           | 150    | MolPort-044-431-643  | 352.44 |
|           | 133    | MolPort-029-884-837 | 295.35 |           | 151    | MolPort-044-809-282  | 405.25 |
|           | 134    | MolPort-029-883-430 | 337.43 |           | 152    | MolPort-044-809-847  | 353.43 |
|           | 135    | MolPort-029-883-647 | 323.40 |           | 153    | MolPort-000-820-216  | 328.33 |
|           | 136    | MolPort-029-883-157 | 309.37 |           | 154    | MolPort-044-809-526  | 369.38 |
|           | 137    | MolPort-039-059-996 | 357.42 |           | 155    | MolPort-044-809-269  | 325.37 |
|           | 138    | MolPort-002-510-495 | 355.31 |           | 156    | MolPort-000-827-950  | 353.33 |

**Table S2.** Continued.

| Group     | Number | Reference ID        | MW     | Group     | Number | Reference ID        | MW     |
|-----------|--------|---------------------|--------|-----------|--------|---------------------|--------|
| <b>17</b> | 157    | MolPort-044-809-976 | 426.41 | <b>19</b> | 175    | MolPort-000-835-972 | 331.38 |
|           | 158    | MolPort-000-814-712 | 331.33 |           | 176    | MolPort-005-977-370 | 346.35 |
|           | 159    | MolPort-000-810-604 | 427.45 |           | 177    | MolPort-000-817-103 | 311.34 |
|           | 160    | MolPort-044-809-279 | 354.41 |           | 178    | MolPort-000-825-694 | 362.35 |
|           | 161    | MolPort-044-431-637 | 358.83 |           | 179    | MolPort-044-431-633 | 358.83 |
|           | 162    | MolPort-044-809-460 | 357.43 |           | 180    | MolPort-044-809-850 | 374.39 |
|           | 163    | MolPort-000-843-327 | 347.37 |           | 181    | MolPort-044-431-632 | 368.44 |
|           | 164    | MolPort-000-791-060 | 443.90 |           | 182    | MolPort-000-816-837 | 313.36 |
|           | 165    | MolPort-000-829-044 | 347.37 |           | 183    | MolPort-000-841-359 | 317.35 |
| <b>18</b> | 166    | MolPort-000-835-912 | 333.35 | <b>20</b> | 184    | MolPort-044-431-630 | 370.41 |
|           | 167    | MolPort-044-809-461 | 358.37 |           | 185    | MolPort-044-809-856 | 349.36 |
|           | 168    | MolPort-000-831-303 | 363.37 |           | 186    | MolPort-000-851-044 | 271.24 |
|           | 169    | MolPort-000-817-289 | 307.71 |           | 187    | MolPort-000-832-070 | 353.33 |
|           | 170    | MolPort-044-809-977 | 406.41 |           | 188    | MolPort-044-809-263 | 358.83 |
|           | 171    | MolPort-000-838-658 | 333.35 |           | 189    | MolPort-044-431-639 | 403.28 |
|           | 172    | MolPort-044-431-625 | 368.44 |           | 190    | MolPort-044-809-845 | 436.44 |
|           | 173    | MolPort-044-431-627 | 417.31 |           | 191    | MolPort-044-809-257 | 368.44 |
|           | 174    | MolPort-000-836-247 | 377.40 |           | 192    | MolPort-044-809-957 | 354.41 |

**Table S2.** Continued.

| Group     | Number | Reference ID        | MW     |
|-----------|--------|---------------------|--------|
| <b>21</b> | 193    | MolPort-000-845-338 | 343.34 |
|           | 194    | MolPort-000-823-841 | 335.34 |
|           | 195    | MolPort-000-823-182 | 299.33 |
|           | 196    | MolPort-044-431-646 | 356.40 |
|           | 197    | MolPort-044-809-452 | 331.37 |
|           | 198    | MolPort-044-431-644 | 338.41 |
|           | 199    | MolPort-002-600-674 | 327.34 |
|           | 200    | MolPort-002-985-610 | 285.31 |
|           | 201    | MolPort-002-143-318 | 357.33 |
|           | 202    | MolPort-002-025-637 | 361.36 |



**Table S3.** Binding check of the compounds in groups 10 and 12 to the ARH domain of NSP3 by MST.

| Number    | Reference ID        | S/N ratio <sup>a</sup> | Number     | Reference ID        | S/N ratio <sup>a</sup> |
|-----------|---------------------|------------------------|------------|---------------------|------------------------|
| 91        | MolPort-000-664-093 | 0.8                    | 111        | MolPort-004-856-353 | 4.4                    |
| 92        | MolPort-002-952-102 | 3.4                    | <b>112</b> | MolPort-000-813-761 | <b>7.5</b>             |
| 93        | MolPort-019-694-241 | 3.6                    | 113        | MolPort-006-809-859 | 1.0                    |
| 94        | MolPort-002-574-436 | 1.3                    | <b>114</b> | MolPort-028-604-154 | <b>5.4</b>             |
| <b>95</b> | MolPort-003-000-526 | <b>12.7</b>            | 115        | MolPort-000-773-077 | 1.3                    |
| <b>96</b> | MolPort-044-431-605 | <b>14.8</b>            | <b>116</b> | MolPort-038-429-727 | <b>5.9</b>             |
| 97        | MolPort-002-665-215 | 1.0                    | 117        | MolPort-006-805-445 | 1.9                    |
| <b>98</b> | MolPort-028-604-773 | <b>7.8</b>             | 118        | MolPort-006-808-970 | 1.7                    |
| 99        | MolPort-005-919-460 | 1.1                    | <b>119</b> | MolPort-038-430-484 | <b>13.5</b>            |
| 100       | MolPort-005-308-515 | 4.7                    |            |                     |                        |

<sup>a</sup> The signal-to-Noise (S/N) ratio higher than 5 in MST indicates that a ligand binds to a target.

The compounds showing the binding are in bold. The compounds exhibiting the high S/N ratio are indicated in gray shades.

**Table S4.** Thirteen out of 82 compounds in the second set (groups from 13 to 21 in Table S2) exhibiting the interaction to the ARH domain of NSP3.

| Number | Reference ID        | S/N ratio <sup>a</sup> | Number | Reference ID        | S/N ratio <sup>a</sup> |
|--------|---------------------|------------------------|--------|---------------------|------------------------|
| 121    | MolPort-021-767-645 | 6.9                    | 138    | MolPort-002-510-495 | 9.6                    |
| 122    | MolPort-029-903-833 | 5.4                    | 147    | MolPort-000-838-047 | 13.6                   |
| 123    | MolPort-007-606-006 | 18.8                   | 173    | MolPort-044-431-627 | 41.9                   |
| 127    | MolPort-035-704-162 | 7.8                    | 175    | MolPort-000-835-972 | 13.3                   |
| 128    | MolPort-035-704-312 | 13.8                   | 190    | MolPort-044-809-845 | 6.9                    |
| 129    | MolPort-035-702-334 | 7.0                    | 200    | MolPort-002-985-610 | 7.1                    |
| 130    | MolPort-029-882-857 | 13.3                   |        |                     |                        |

<sup>a</sup> The signal-to-Noise (S/N) ratio higher than 5 in MST indicates that a ligand binds to a target.

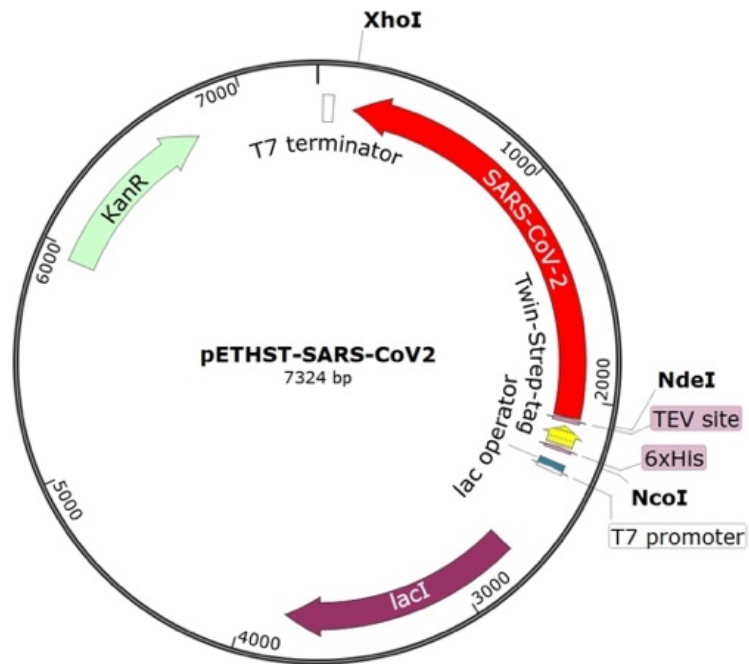

**Figure S1.** Schematic of the pETHST-SARS-CoV-2 plasmid. The thrombin cleavage site and the T7 tag in the vector pET28a (+) were replaced to the Twin-Strep tag and the TEV cleavage site to generate the expression vector pETHST.

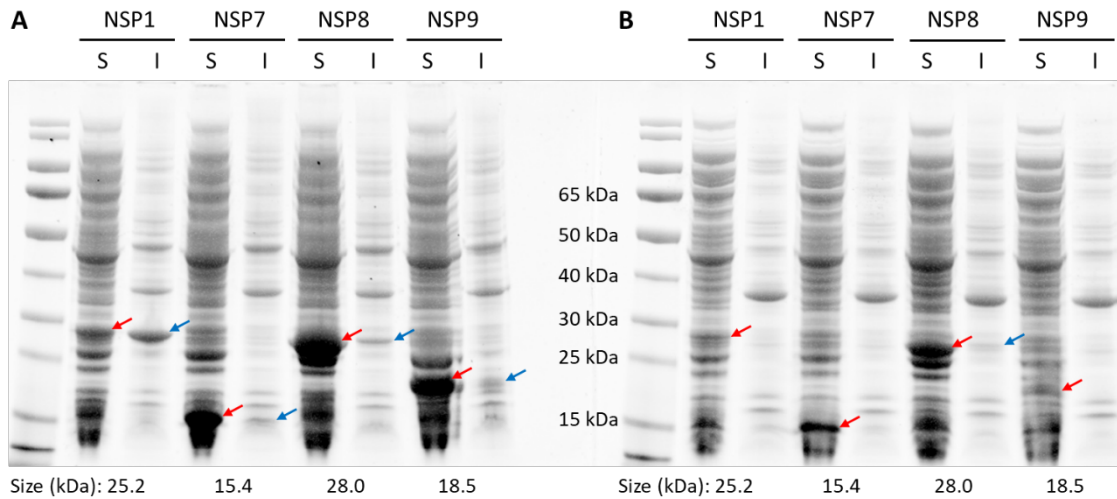

**Figure S2-1.** SDS-PAGE for expression of SARS-CoV-2 NSP1, NSP7, NSP8 and NSP9. The protein expression was induced with 0.2 mM of IPTG for 2 hours at 37 °C (A) and with 0.4 mM of IPTG for 18 hours at 16 °C (B). The red and blue arrows indicate the target proteins in soluble (S) and insoluble (I) fractions, respectively.

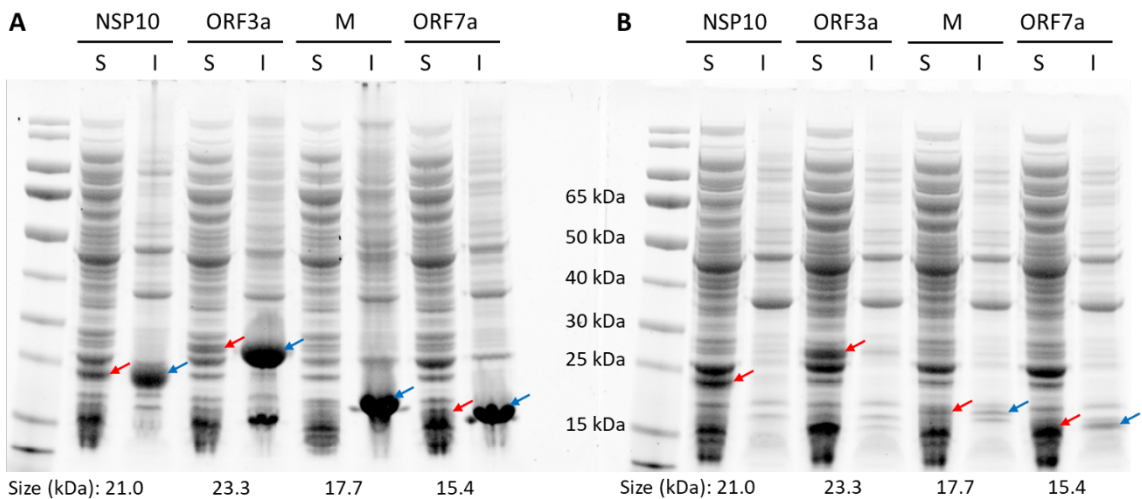

**Figure S2-2.** SDS-PAGE for expression of SARS-CoV-2 NSP10, ORF3a, M and ORF7a. The protein expression was induced with 0.2 mM of IPTG for 2 hours at 37 °C (A) and with 0.4 mM of IPTG for 18 hours at 16 °C (B). The red and blue arrows indicate the target proteins in soluble (S) and insoluble (I) fractions, respectively.

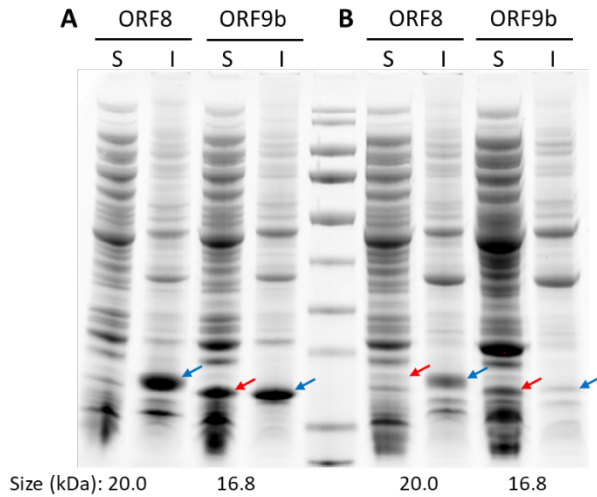

**Figure S2-3.** SDS-PAGE for expression of SARS-CoV-2 NSP10, ORF8 and ORF9b. The protein expression was induced with 0.2 mM of IPTG for 2 hours at 37 °C (**A**) and with 0.4 mM of IPTG for 18 hours at 16 °C (**B**). The red and blue arrows indicate the target proteins in soluble (S) and insoluble (I) fractions, respectively.

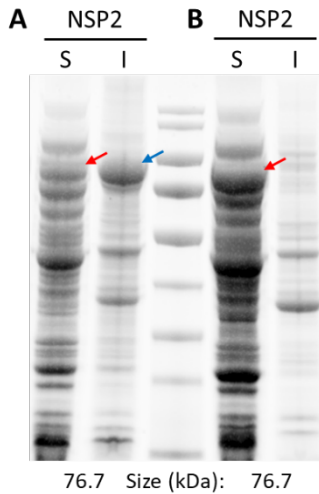

**Figure S2-4.** SDS-PAGE for expression of SARS-CoV-2 NSP2. The protein expression was induced with 0.2 mM of IPTG for 2 hours at 37 °C (**A**) and with 0.4 mM of IPTG for 18 hours at 16 °C (**B**). The red and blue arrows indicate the target proteins in soluble (S) and insoluble (I) fractions, respectively.

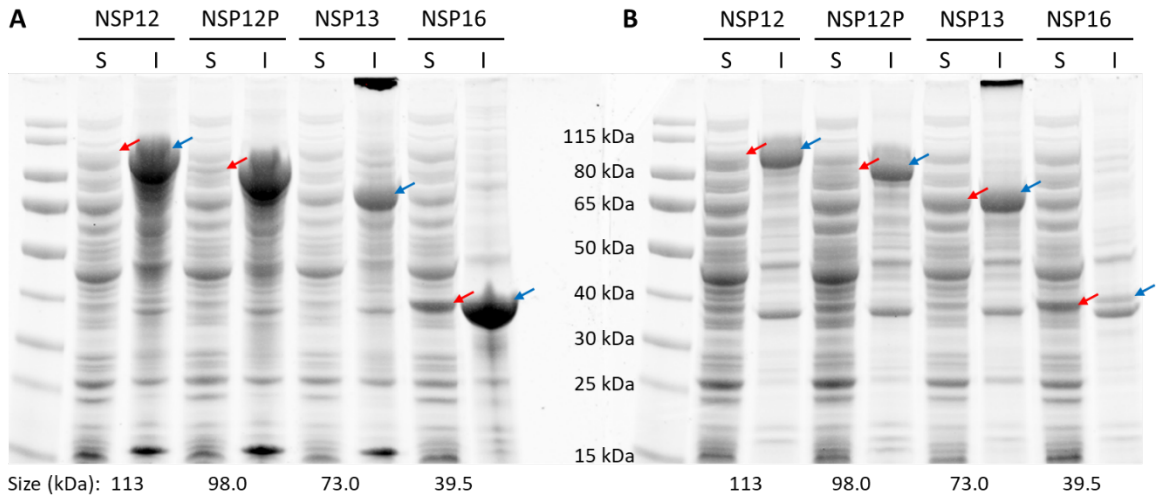

**Figure S2-5.** SDS-PAGE for expression of SARS-CoV-2 NSP12, NSP12P, NSP13 and NSP16. The protein expression was induced with 0.2 mM of IPTG for 2 hours at 37 °C (**A**) and with 0.4 mM of IPTG for 18 hours at 16 °C (**B**). The red and blue arrows indicate the target proteins in soluble (S) and insoluble (I) fractions, respectively.

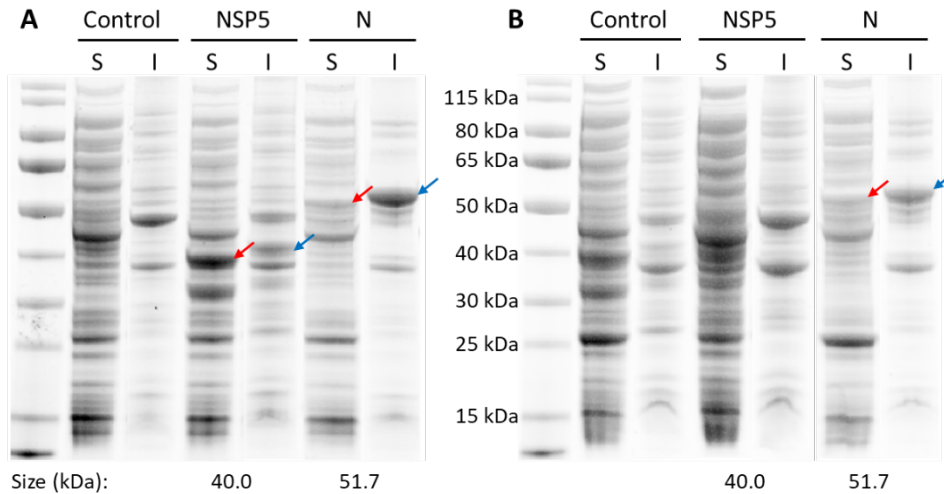

**Figure S2-6.** SDS-PAGE for expression of SARS-CoV-2 NSP5 and N. The protein expression was induced with 0.2 mM of IPTG for 2 hours at 37 °C (**A**) and with 0.4 mM of IPTG for 18 hours at 16 °C (**B**). The red and blue arrows indicate the target proteins in soluble (S) and insoluble (I) fractions, respectively.

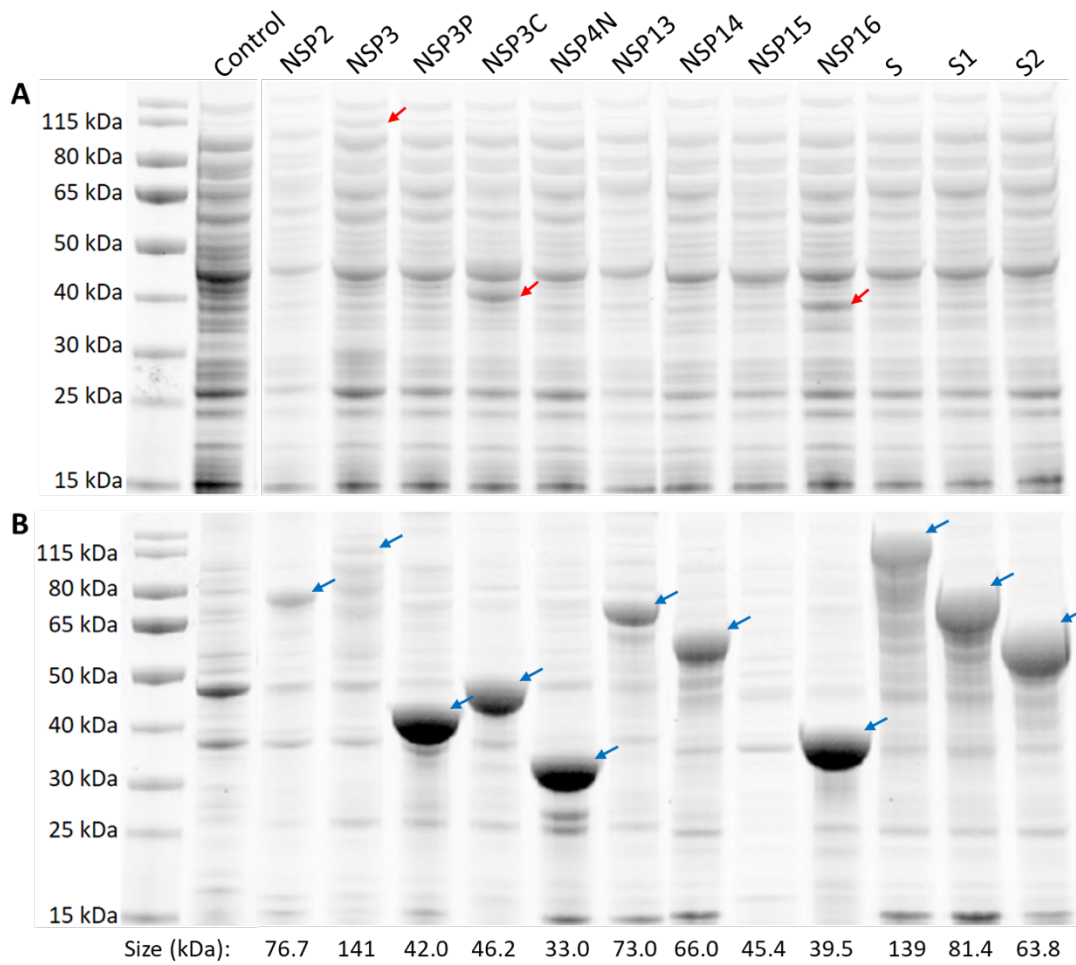

**Figure S2-7.** SDS-PAGE for expression of SARS-CoV-2 NSP5 and N. The protein expression was induced with 0.2 mM of IPTG for 2 hours at 37 °C. The red and blue arrows indicate the target proteins in soluble (**A**) and insoluble (**B**) fractions, respectively.

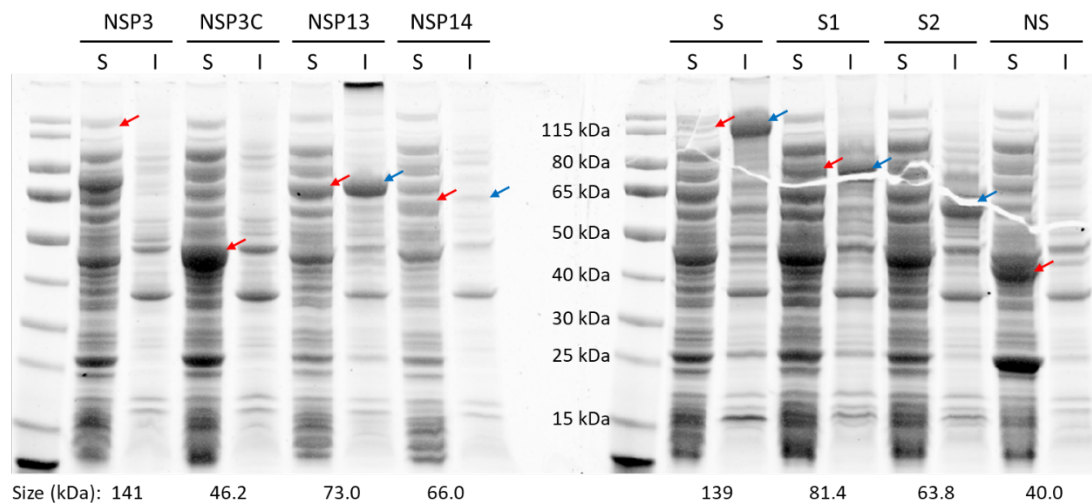

**Figure S2-8.** SDS-PAGE for expression of SARS-CoV-2 NSP3, NSP3C, NSP13, NSP14, S, S1, S2 and NS. The protein expression was induced with 0.4 mM of IPTG for 18 hours at 16 °C. The red and blue arrows indicate the target proteins in soluble (S) and insoluble (I) fractions, respectively.

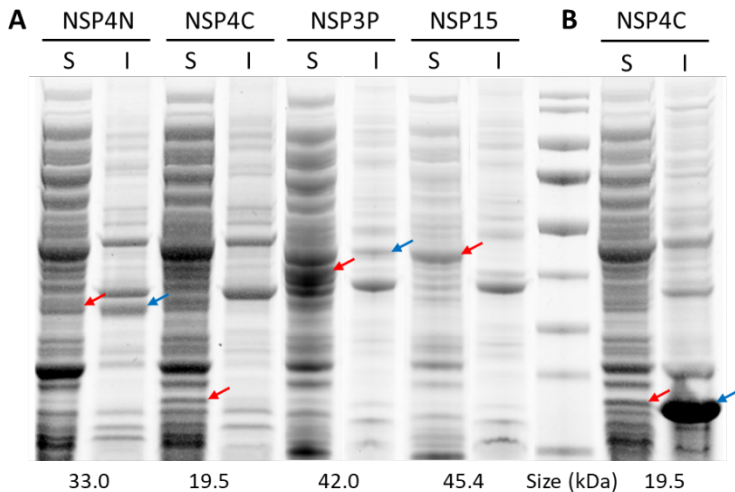

**Figure S2-9.** SDS-PAGE for expression of SARS-CoV-2 NSP4N, NSP4C, NSP3P and NSP15. The protein expression was induced with 0.4 mM of IPTG for 18 hours at 16 °C (A) and with 0.2 mM of IPTG for 2 hours at 37 °C (B). The red and blue arrows indicate the target proteins in soluble (S) and insoluble (I) fractions, respectively.



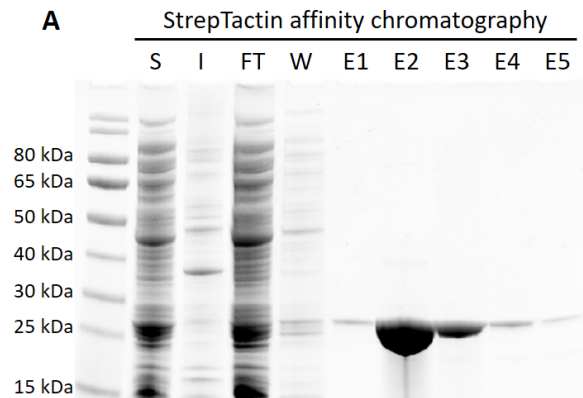

S, soluble; I, insoluble; FT, flow-through; W, washing; E, elution

Washing buffer I: 50 mM Tris-Cl, pH 8.0, 150 mM NaCl

Elution buffer: 50 mM Tris-Cl, pH 8.0, 150 mM NaCl, 2.5 mM desthiobiotin

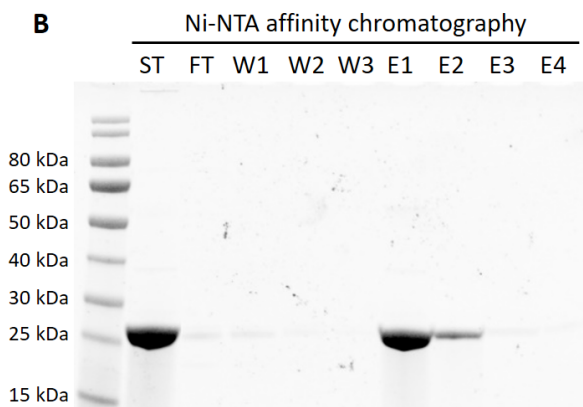

ST: Eluted fraction from **A**; W1, W2 & W3: washing buffer II (50 mM Tris-Cl, pH 8.0, 150 mM NaCl, 20 mM Imidazole)

E1: Washing buffer II + 200 mM Imidazole

E2: Washing buffer II + 400 mM Imidazole

E3: Washing buffer II + 800 mM Imidazole

E4: Washing buffer II + 1 M Imidazole

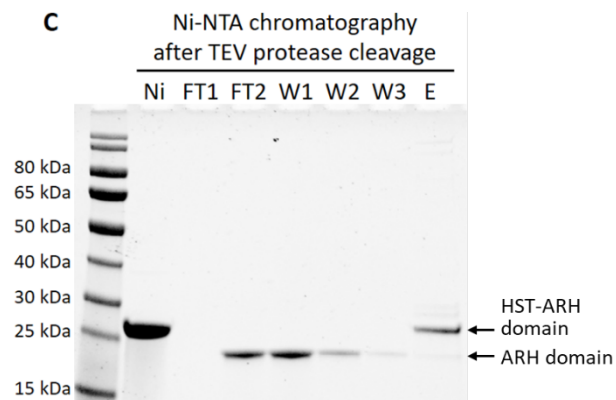

Ni: Eluted fraction from **B**; W1, W2 & W3: washing buffer II (50 mM Tris-Cl, pH 8.0, 150 mM NaCl, 20 mM Imidazole)

E: Washing buffer II + 800 mM Imidazole

**Figure S3.** SDS-PAGE gels for the purification of SARS-CoV-2 NSP3 (ARH domain).

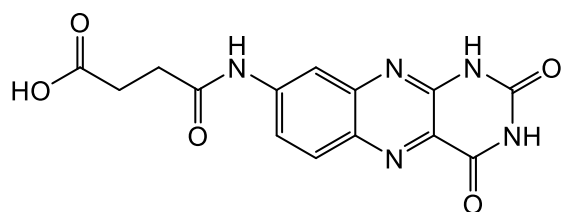

95

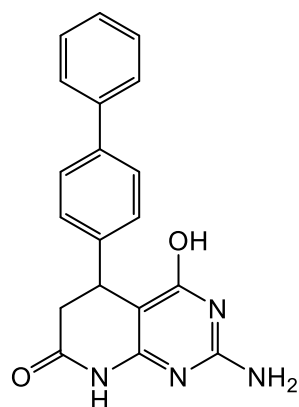

96

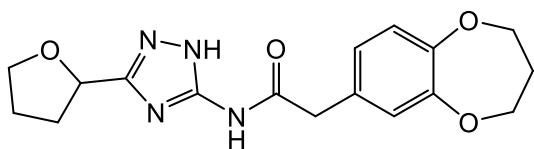

98

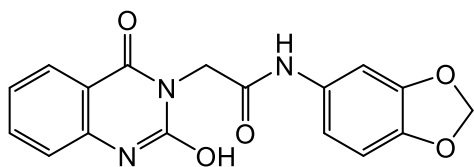

112

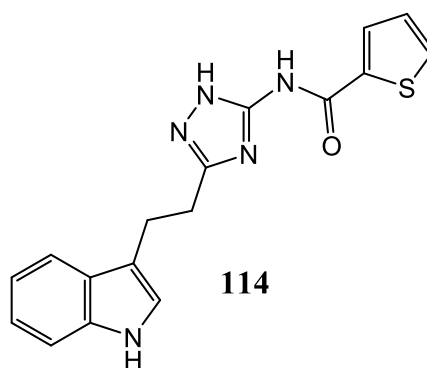

114

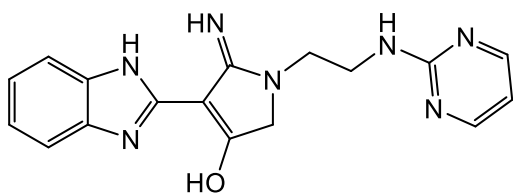

116

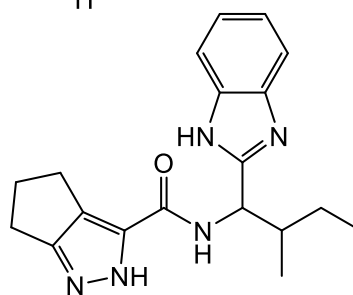

119

**Figure S4.** The chemical structures of seven compounds that bind to the ARH domain in the first set. Compounds **96**, **98** and **119** are racemates.

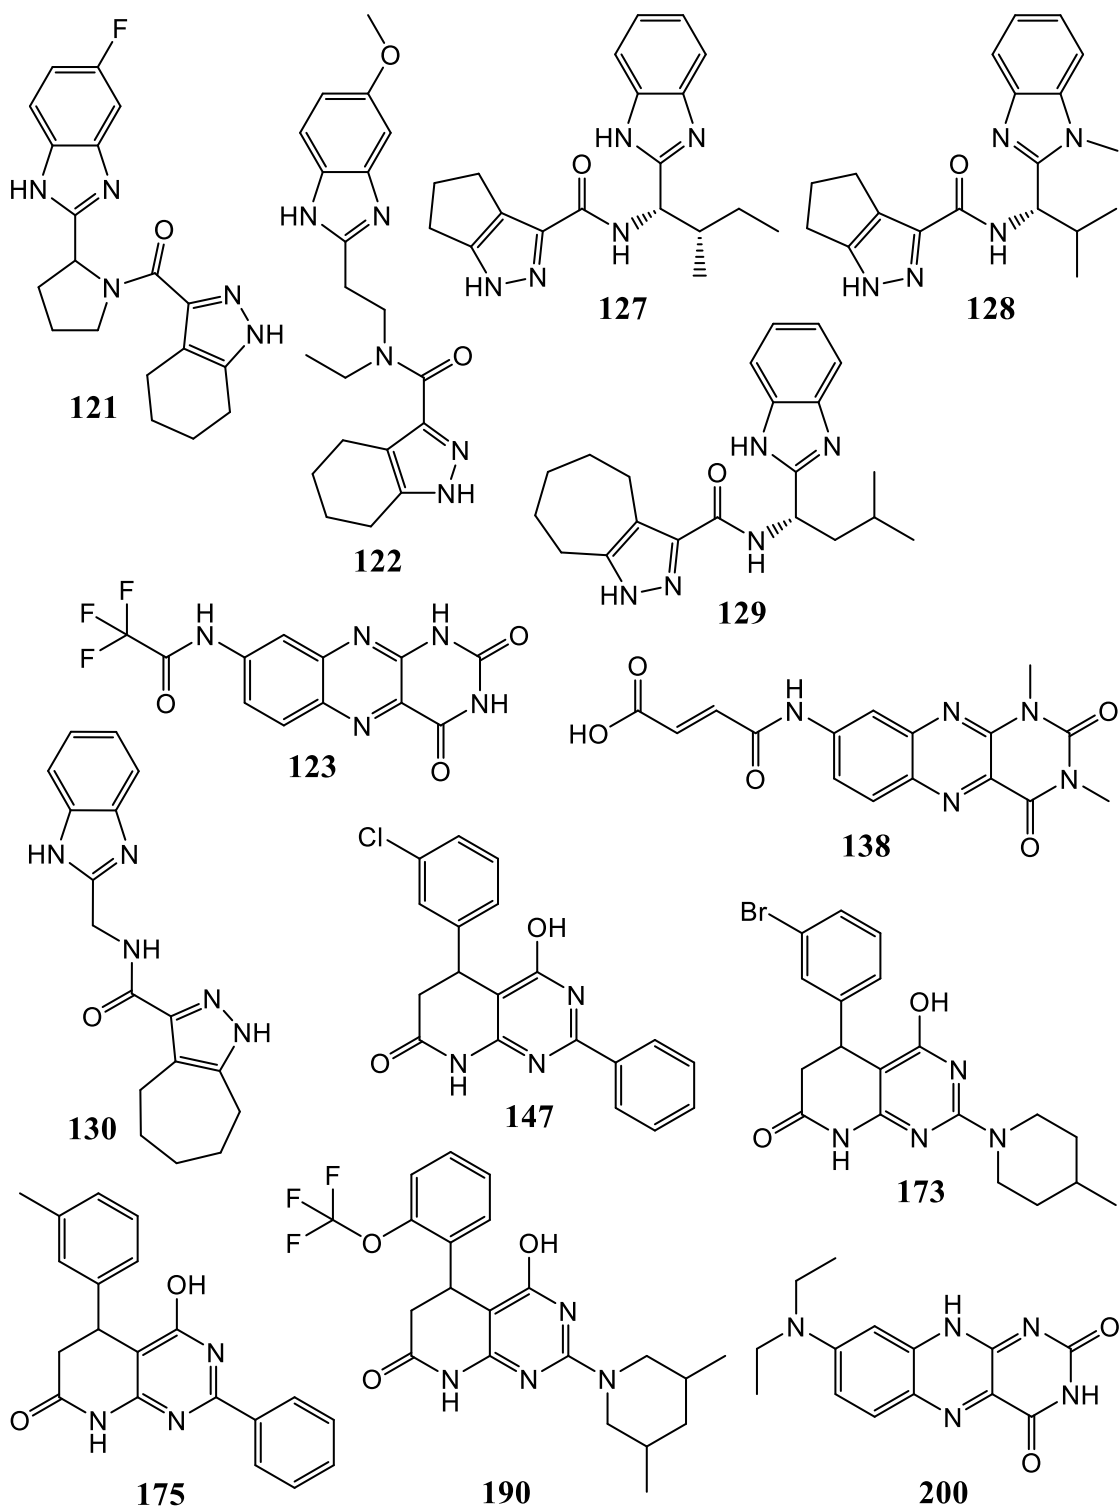

**Figure S5.** The chemical structures of 13 compounds that bind to the ARH domain in the second set. Compounds **121**, **147**, **174**, **175** and **190** are racemates.
